# Supplementary material for: Modelling the impact of non-pharmaceutical interventions on workplace transmission of SARS-CoV-2 in the home-delivery sector
Source: PubMed Central journal article supplement (PMC10162531; doi:10.1371/journal.pone.0284805), 2023-05-05

(a) Index Case = Driver

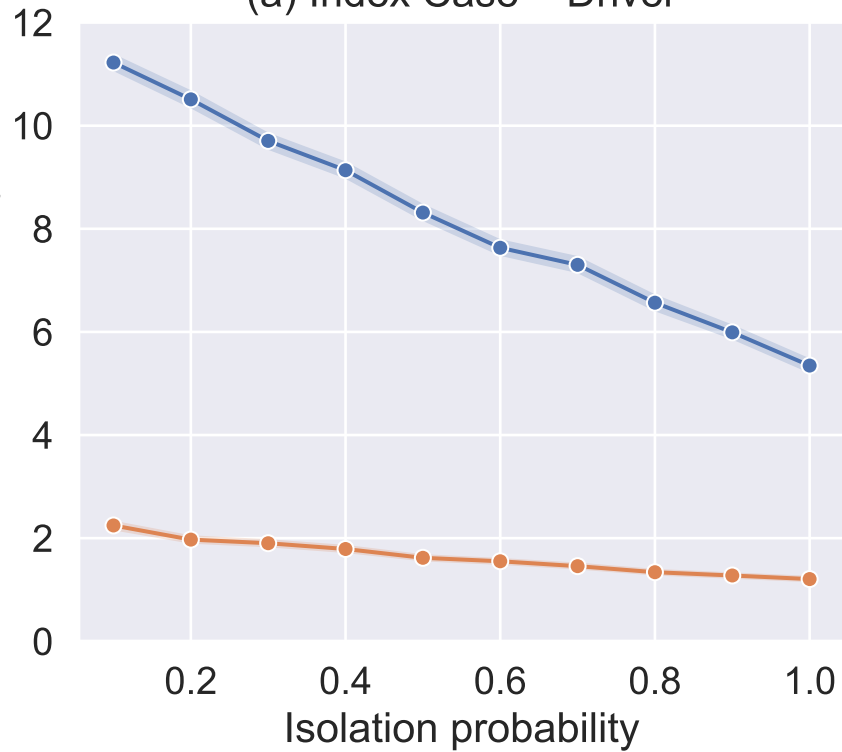

(b) Index Case = Picker

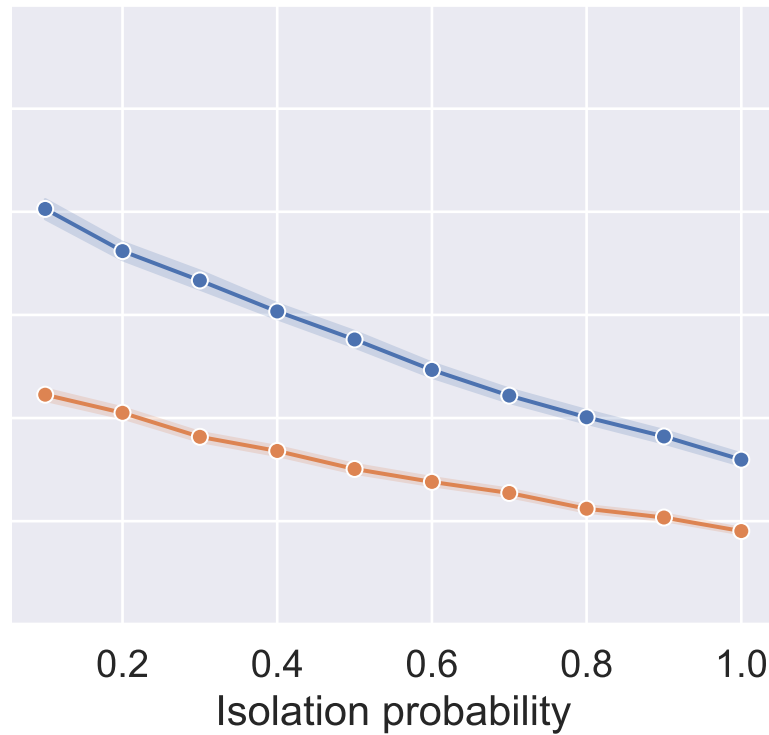

(c) Index Case = Office

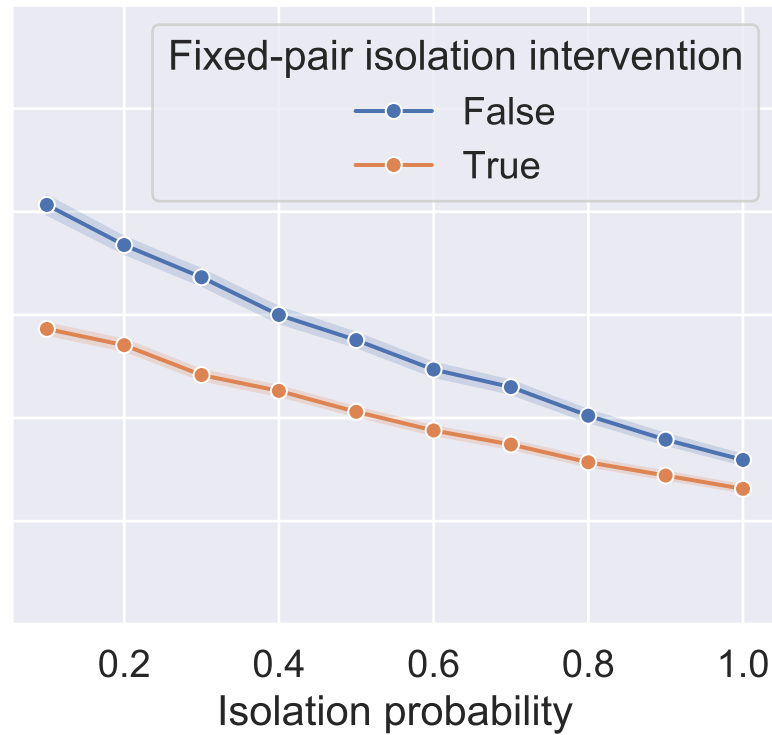

Supplement: pone.0284805.s013.pdf [file pone.0284805.s013.pdf]
