# Supplementary material for: Modelling the impact of non-pharmaceutical interventions on workplace transmission of SARS-CoV-2 in the home-delivery sector
Source: PubMed Central journal article supplement (PMC10162531; doi:10.1371/journal.pone.0284805), 2023-05-05

(a) Aerosol scale factor: 0.5

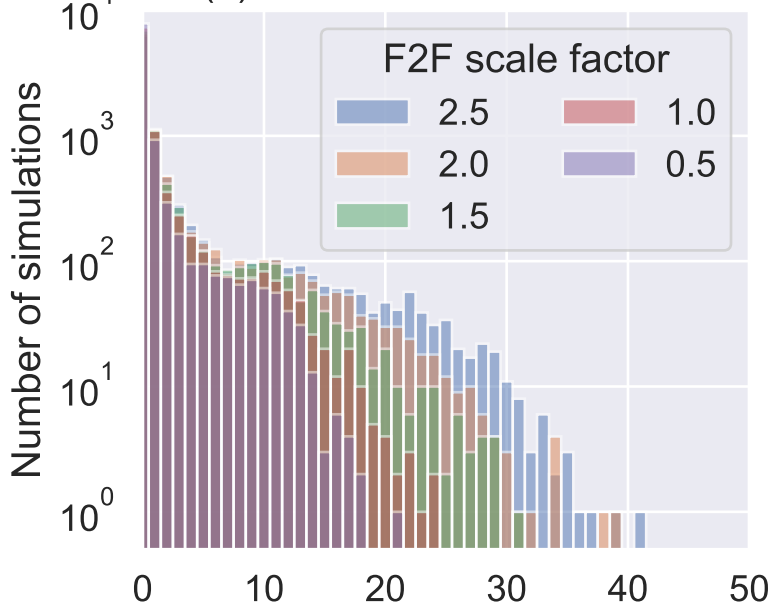

(b) Aerosol scale factor: 1.0

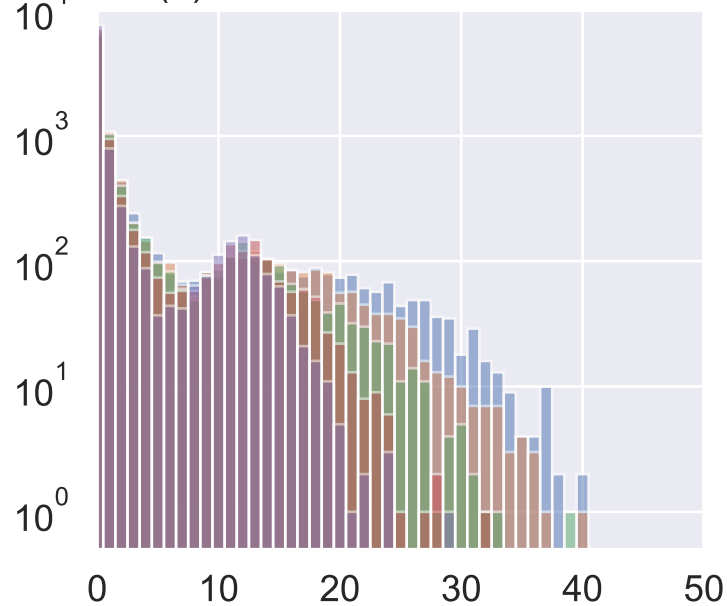

(c) Aerosol scale factor: 2.5

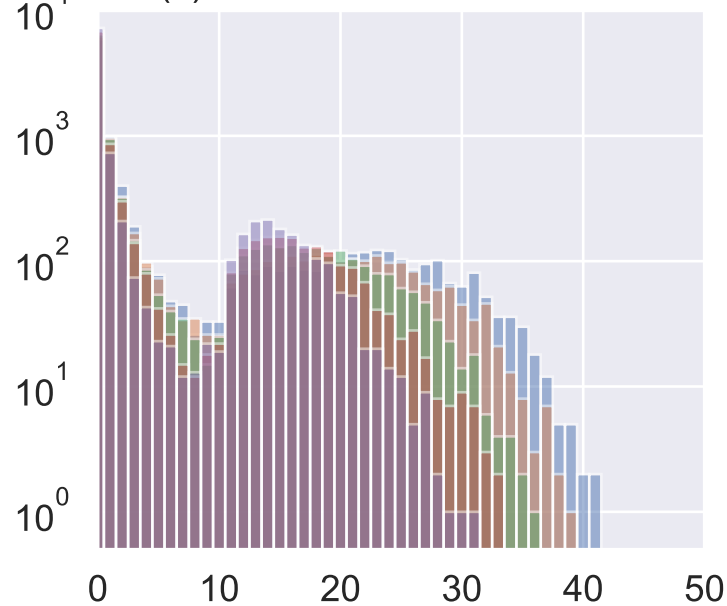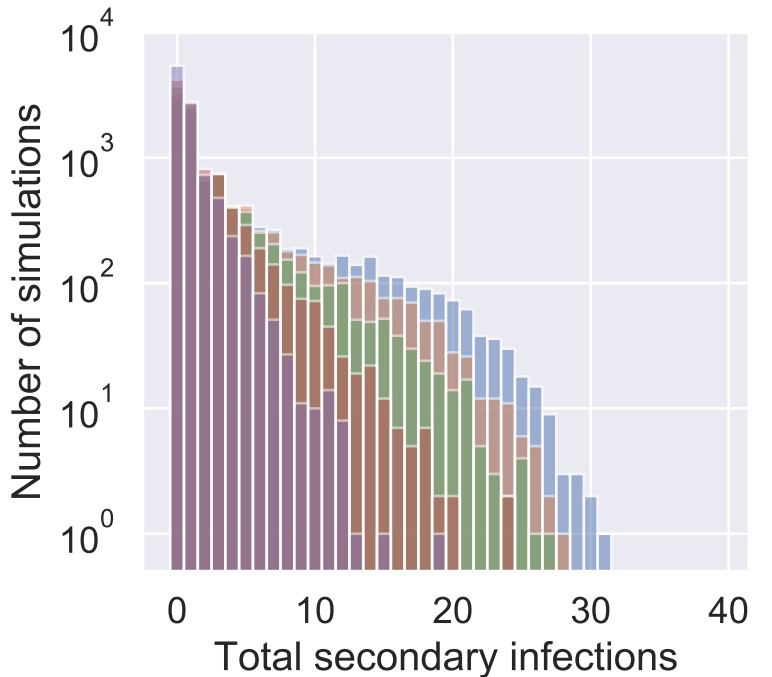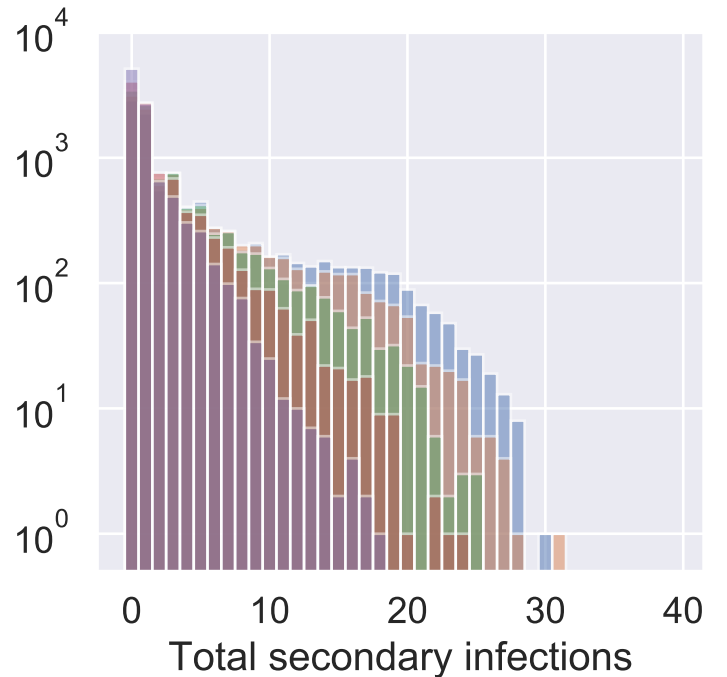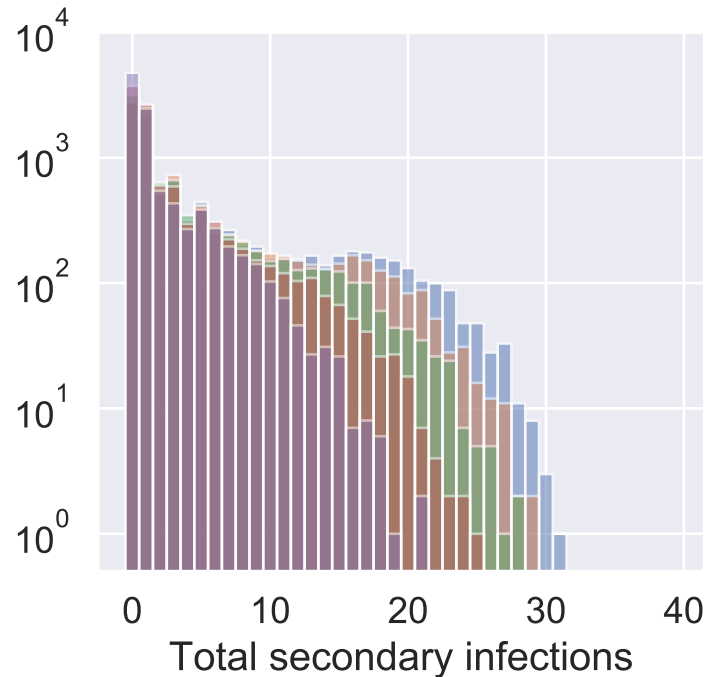

Supplement: pone.0284805.s015.pdf [file pone.0284805.s015.pdf]
